# Supplementary material for: Effect of Urban Particulate Matter on Vocal Fold Fibrosis through the MAPK/NF-κB Signaling Pathway
Source: MDPI journal article supplement (doi:10.3390/ijms21186643), 2020-09-10
Supplement: s1 [file s1]

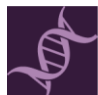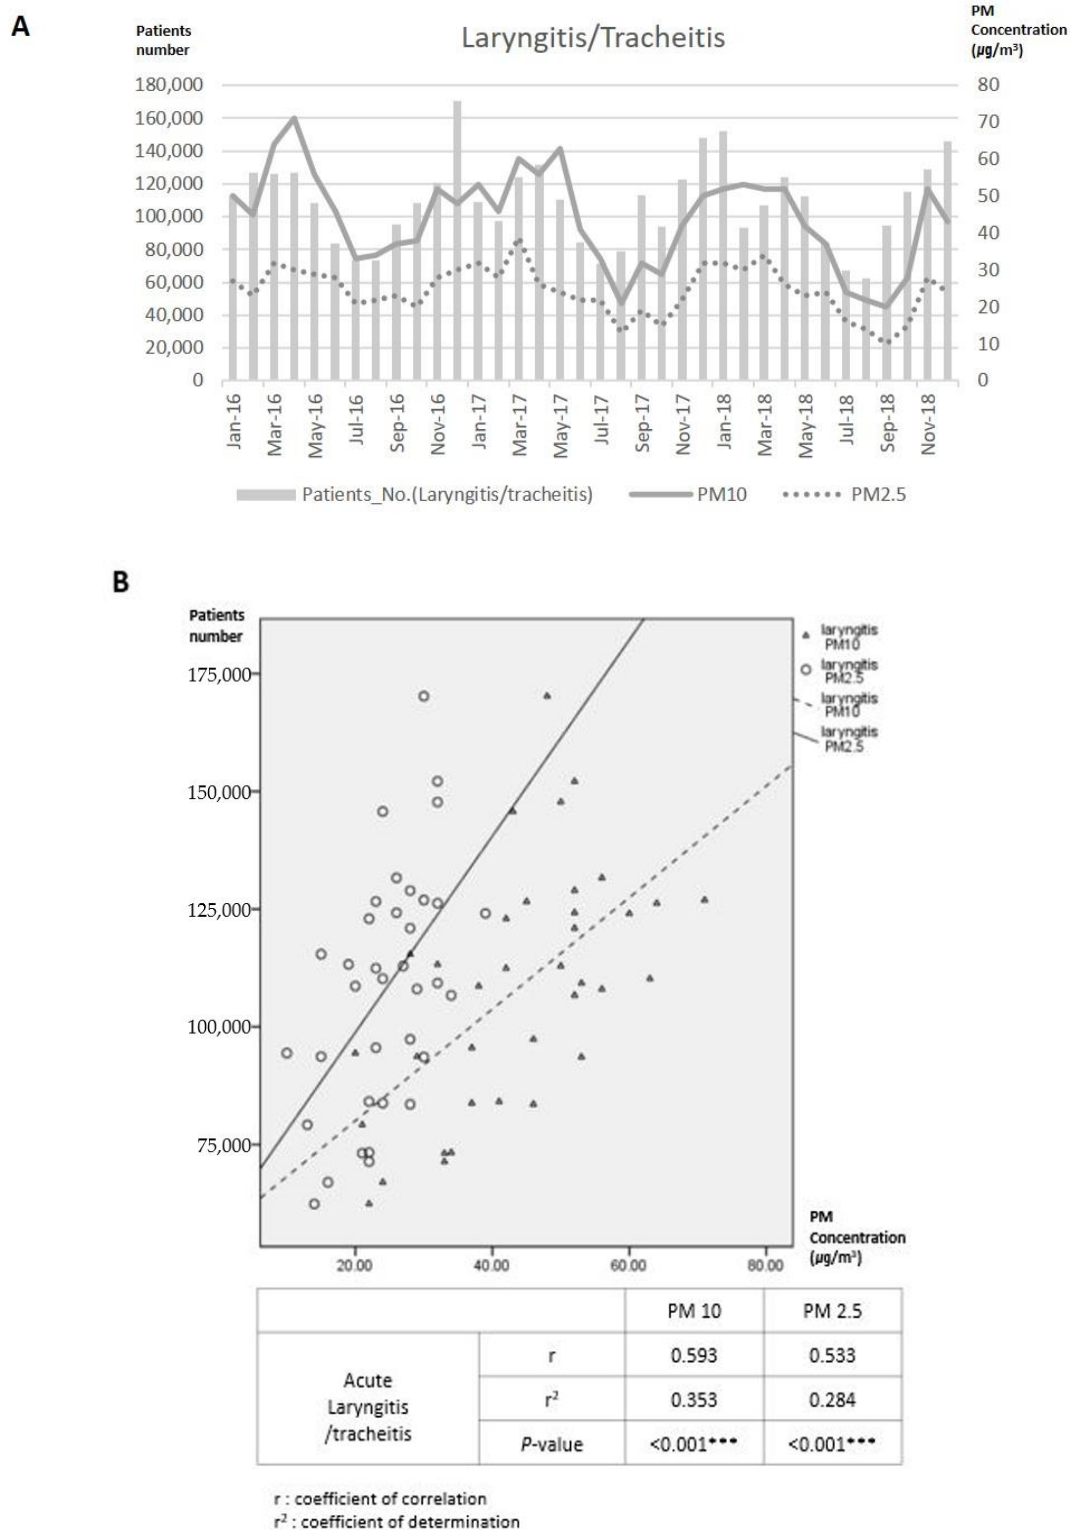

**Figure S1.** Relationship between the incidence of acute laryngitis/tracheitis and the PM 10/PM 2.5 concentration. (A) Graph of PM concentration and number of acute laryngitis/tracheitis patients in Seoul, Republic of Korea from January 2016 to December 2018. (B) Results of Pearson correlation coefficient analysis. The airborne PM 10/PM 2.5 concentration and incidence of acute laryngitis/tracheitis were significantly positively correlated. r: coefficient of correlation, r<sup>2</sup>: coefficient of determination. \*\*\*  $p < 0.001$ .
